# Supplementary material
Source: Springer Nature journal article supplement (https://www.springermedizin.de/resource/supplementary/12950_2012_342_MOESM1_ESM.pdf/9557506)

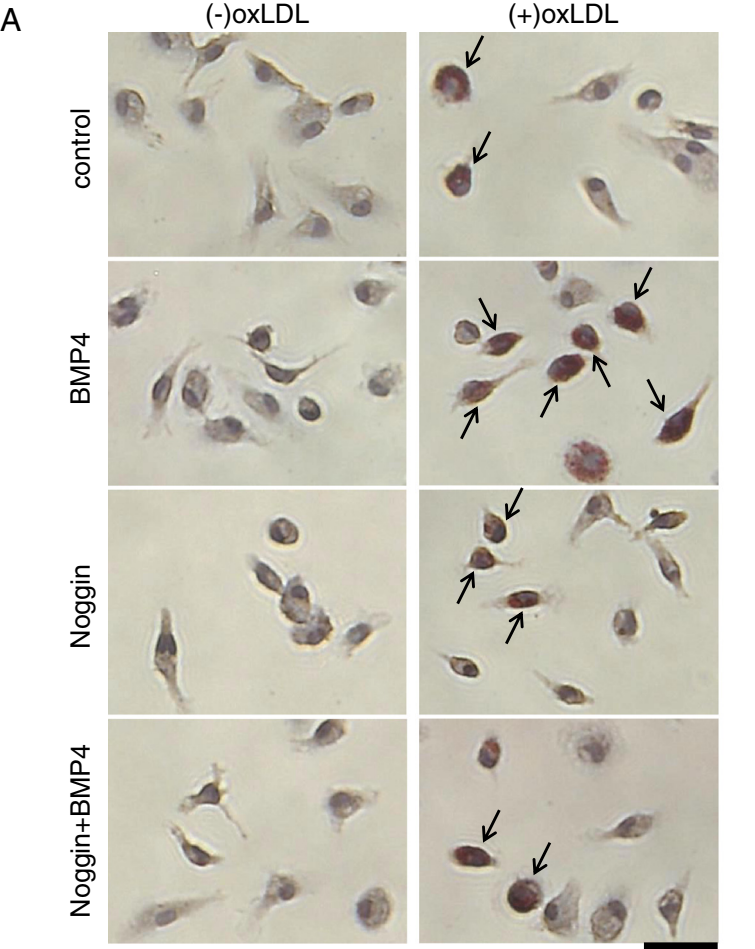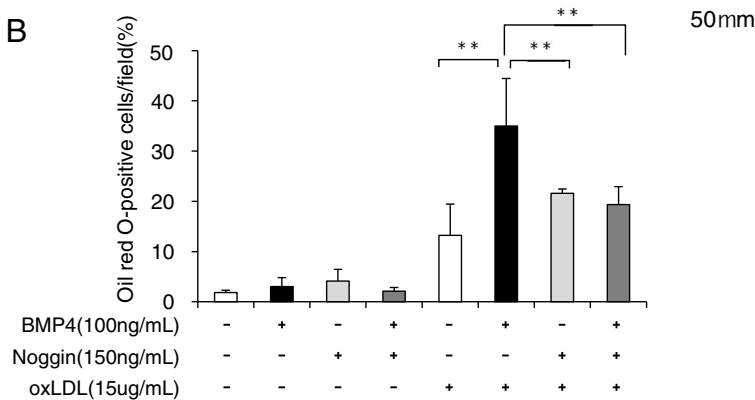

Supplement: MOESM1 [file 9557506]
